# Supplementary material
Source: Springer Nature journal article supplement (https://www.springermedizin.de/resource/supplementary/12963_2013_224_MOESM1_ESM.pdf/9572390)
Supplement: MOESM1 [file 9572390]

0% 10% 20% 30% 40% 50% 60% 70% 80% 90% 100%

Selection 1

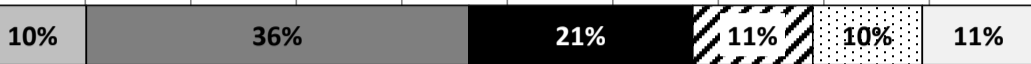

Selection 2

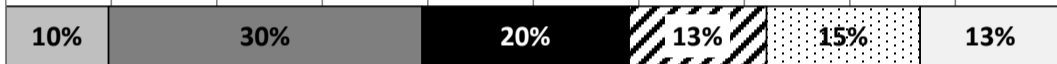

Selection 3

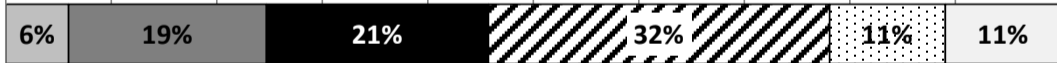

■ Viral hepatitis (B15-B19)

■ Liver diseases (K70-K76)

■ Liver cancer (C22)

▨ Other neoplasms (C00-D48)

▩ Circulatory diseases (I00-I99)

□ Other causes
